# Supplementary material for: A dual conducting network corbelled hydrated vanadium pentoxide cathode for high-rate aqueous zinc-ion batteries
Source: Royal Society of Chemistry journal article supplement (doi:10.1039/d1nr07458j), 2021-12-07
Supplement: d1nr07458j1.pdf [file d1nr07458j1.pdf]

Electronic supplementary information

**Dual conducting network corbelled hydrated  
vanadium pentoxide cathode for high-rate aqueous  
zinc-ion batteries**

Yu-Ting Xu,<sup>†</sup> Meng-Jie Chen,<sup>†</sup> Hong-Rui Wang, Chun-Jiao Zhou, Qiang Ma, Qi Deng,  
Xiong-Wei Wu and Xian-Xiang Zeng\*

*Hunan Agricultural University, School of Chemistry and Materials Science, Nongda  
Road 1, Furong District, Changsha, Hunan 410128, P.R. China*

To whom correspondence should be addressed. *E-mail:* [xxzeng@hunau.edu.cn](mailto:xxzeng@hunau.edu.cn)

<sup>†</sup> These authors contributed equally to this work.

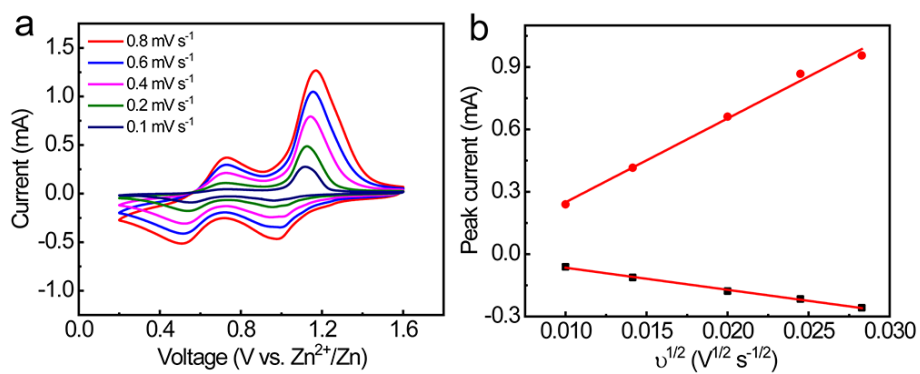

**Fig. S1** (a) Cyclic voltammograms of V<sub>2</sub>O<sub>5</sub>@CC at different scan rates and (b) corresponding relationship of peak current versus square root of scan rate.

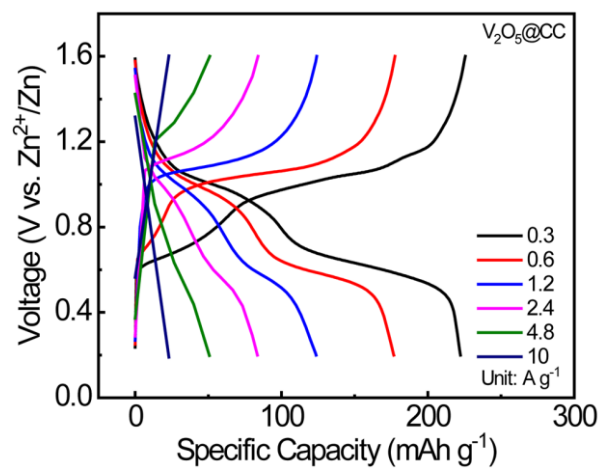

**Fig. S2** (a) The charge/discharge profiles at 0.3, 0.6, 1.2, 2.4, 4.8, 10 A g<sup>-1</sup> for V<sub>2</sub>O<sub>5</sub>@CC/Zn cell.

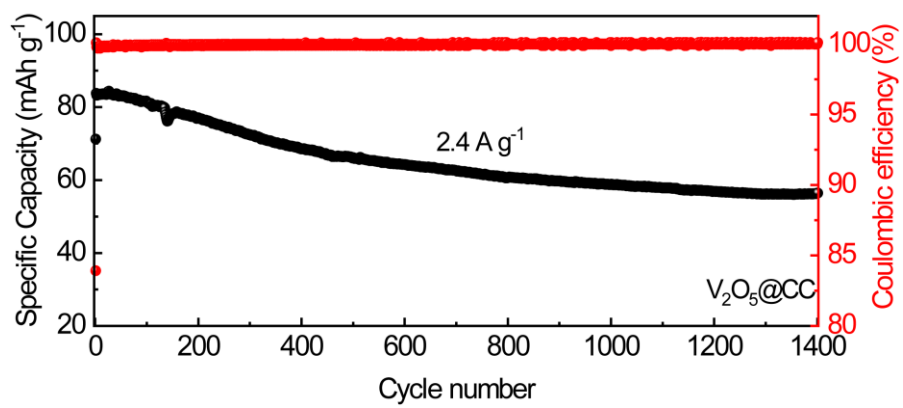

**Fig. S3** Long-term cycling performance for  $V_2O_5@CC/Zn$  cell.

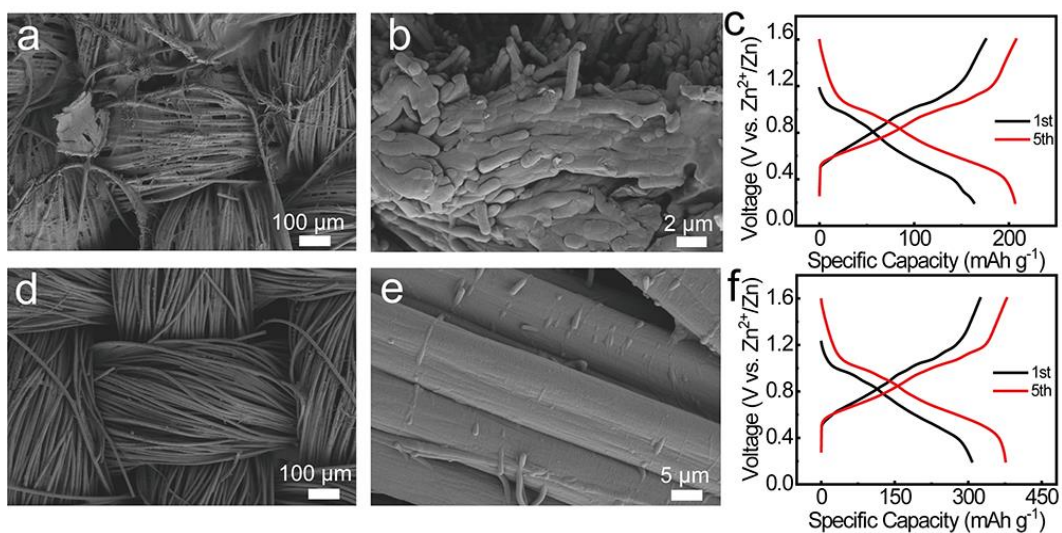

**Fig. S4** SEM images of PPy@V<sub>2</sub>O<sub>5</sub>@CC cathode with different amount of V<sub>2</sub>O<sub>5</sub> loading by controlling the amount of V<sub>2</sub>O<sub>5</sub> precursor (a, b: 0.9 g) and (d, e: 0.72 g), and corresponding (c: 0.9 g: and f: 0.72 g) electrochemical performance curves for PPy@V<sub>2</sub>O<sub>5</sub>@CC cathode at 0.3 A g<sup>-1</sup>.

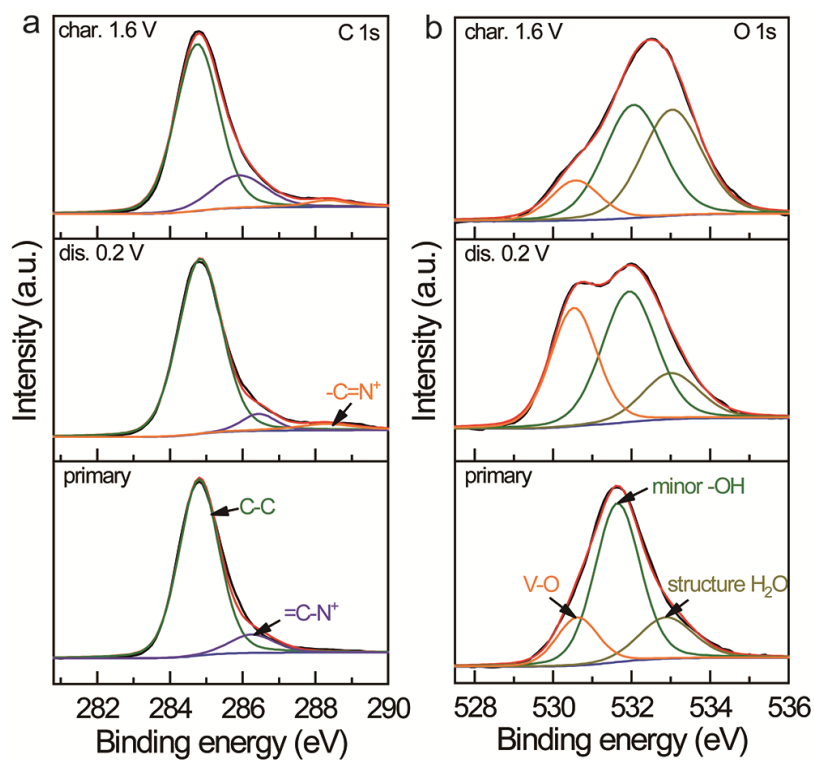

**Fig. S5** XPS plots of C 1s (a) and O 1s (b) for PPy@V<sub>2</sub>O<sub>5</sub>@CC cathode at primary state, fully discharging state (0.2 V) and full charging state (1.6 V).
